# Supplementary material for: A multi-disciplinary comparison of great ape gut microbiota in a central African forest and European zoo
Source: PubMed Central journal article supplement (PMC7645722; doi:10.1038/s41598-020-75847-3), 2020-11-05
Supplement: 41598_2020_75847_MOESM1_ESM.pdf [file 41598_2020_75847_MOESM1_ESM.pdf]

**Title : A multi-disciplinary comparison of great ape gut microbiota in a central African forest and European zoo**

Victor Narat<sup>1,2\*</sup>, Katherine R Amato<sup>3,4\*</sup>, Noémie Ranger<sup>5</sup>, Maud Salmona<sup>5,6</sup>, Séverine Mercier Delarue<sup>5</sup>, Stephanie Rupp<sup>7</sup>, Philippe Ambata<sup>8</sup>, Richard Njouom<sup>9</sup>, François Simon<sup>5</sup>, Tamara Giles-Vernick<sup>2,4\*\*</sup>, Jérôme LeGoff<sup>5,6\*\*</sup>

Corresponding authors: Jérôme LeGoff and Tamara Giles-Vernick, [tamara.giles-vernick@pasteur.fr](mailto:tamara.giles-vernick@pasteur.fr)

<sup>1</sup> Eco-anthropologie, UMR7206 CNRS/MNHN/Paris Diderot, Site du Musée de l'Homme, Paris, France.

<sup>2</sup> Institut Pasteur, Anthropology and Ecology of Disease Emergence Unit, Paris, France

<sup>3</sup> Department of Anthropology, Northwestern University

<sup>4</sup> Humans and the Microbiome, CIFAR, Toronto, Canada

<sup>5</sup> Université de Paris, Equipe INSIGHT, Inserm U976, F-75010 Paris, France

<sup>6</sup> Département des Agents Infectieux, Virologie et Greffes, AP-HP, Hôpital Saint-Louis, F-75010 Paris, France

<sup>7</sup> Department of Anthropology, City University of New York – Lehman College, New York, NY

<sup>8</sup> Ministry of Agriculture and Rural Development, Yaounde, Cameroon

<sup>9</sup> Centre Pasteur du Cameroun, Yaounde, Cameroon

\* These authors contributed equally to this work

\*\* These authors contributed equally to this work

**Supplementary Table S1: QIIME2 sequence data processing summary by sample**

| Extraction ID | Sample ID | Site     | Species    | Input sequences | Quality filtered sequences | % of input passed filter | Denoiised sequences | Pair end merged sequences | % of input merged | Non chimeric sequences | % of input non chimeric | Number of ASV after rarefaction at 200,000 reads |
|---------------|-----------|----------|------------|-----------------|----------------------------|--------------------------|---------------------|---------------------------|-------------------|------------------------|-------------------------|--------------------------------------------------|
| 7             | FB-002    | Cameroon | Chimpanzee | 779377          | 614206                     | 78.81                    | 612650              | 548023                    | 70.32             | 492131                 | 63.14                   | 585                                              |
| 13            | FB-004    | Cameroon | Chimpanzee | 1071327         | 828930                     | 77.37                    | 823161              | 688240                    | 64.24             | 613704                 | 57.28                   | 686                                              |
| 32            | FB-006    | Cameroon | Chimpanzee | 892730          | 781969                     | 87.59                    | 776915              | 706611                    | 79.15             | 648157                 | 72.6                    | 834                                              |
| 34            | FB-005    | Cameroon | Chimpanzee | 1004960         | 859909                     | 85.57                    | 853105              | 759498                    | 75.57             | 701968                 | 69.85                   | 924                                              |
| 35            | FB-001    | Cameroon | Chimpanzee | 977282          | 854903                     | 87.48                    | 848844              | 773779                    | 79.18             | 687625                 | 70.36                   | 932                                              |
| 40            | FB-003    | Cameroon | Chimpanzee | 883361          | 777470                     | 88.01                    | 772897              | 688985                    | 78.00             | 619858                 | 70.17                   | 793                                              |
| 51            | 2017-B-05 | Zoo      | Chimpanzee | 596845          | 470296                     | 78.8                     | 464659              | 412687                    | 69.14             | 383835                 | 64.31                   | 878                                              |
| 54            | 2017-B-02 | Zoo      | Chimpanzee | 1106236         | 945969                     | 85.51                    | 938455              | 804366                    | 72.71             | 752581                 | 68.03                   | 1134                                             |
| 57            | 2017-B-01 | Zoo      | Chimpanzee | 894835          | 765643                     | 85.56                    | 757274              | 638060                    | 71.3              | 574249                 | 64.17                   | 1122                                             |
| 63            | 2017-B-03 | Zoo      | Chimpanzee | 938472          | 824845                     | 87.89                    | 818624              | 714811                    | 76.17             | 661436                 | 70.48                   | 1183                                             |
| 64            | 2017-B-06 | Zoo      | Chimpanzee | 1081546         | 929799                     | 85.97                    | 924640              | 819432                    | 75.76             | 735932                 | 68.04                   | 831                                              |
| <b>61BIS</b>  | 2017-B-04 | Zoo      | Chimpanzee | 3591434         | 3437099                    | 95.7                     | 3420867             | 3219109                   | 89.63             | 2732097                | 76.07                   | 1630                                             |
| 1             | EA-001    | Cameroon | Gorilla    | 887030          | 685547                     | 77.29                    | 681637              | 536280                    | 60.46             | 498714                 | 56.22                   | 545                                              |
| 2             | DA-007    | Cameroon | Gorilla    | 689517          | 538812                     | 78.14                    | 536631              | 445122                    | 64.56             | 436312                 | 63.28                   | 589                                              |
| 5             | DA-009    | Cameroon | Gorilla    | 858214          | 639931                     | 74.57                    | 634272              | 498936                    | 58.14             | 457021                 | 53.25                   | 646                                              |
| 20            | DA-003    | Cameroon | Gorilla    | 764833          | 593154                     | 77.55                    | 589026              | 508728                    | 66.51             | 495227                 | 64.75                   | 813                                              |
| 21            | EA-004    | Cameroon | Gorilla    | 838798          | 627393                     | 74.8                     | 623715              | 463292                    | 55.23             | 429555                 | 51.21                   | 542                                              |
| 22            | EA-002    | Cameroon | Gorilla    | 1027815         | 783137                     | 76.19                    | 776270              | 569320                    | 55.39             | 488506                 | 47.53                   | 629                                              |
| 23            | EA-005    | Cameroon | Gorilla    | 1107270         | 951438                     | 85.93                    | 945956              | 842316                    | 76.07             | 791705                 | 71.5                    | 673                                              |
| 24            | EA-003    | Cameroon | Gorilla    | 991161          | 855999                     | 86.36                    | 850603              | 741905                    | 74.85             | 677583                 | 68.36                   | 645                                              |
| 26            | DA-004    | Cameroon | Gorilla    | 921334          | 808300                     | 87.73                    | 802937              | 712469                    | 77.33             | 667638                 | 72.46                   | 987                                              |
| 27            | DA-001    | Cameroon | Gorilla    | 1187800         | 1040254                    | 87.58                    | 1033460             | 922825                    | 77.69             | 867548                 | 73.04                   | 923                                              |
| 33            | EA-006    | Cameroon | Gorilla    | 906695          | 773332                     | 85.29                    | 767822              | 667802                    | 73.65             | 597806                 | 65.93                   | 686                                              |

|              |           |          |         |         |         |       |         |         |       |         |       |      |
|--------------|-----------|----------|---------|---------|---------|-------|---------|---------|-------|---------|-------|------|
| <b>36</b>    | DA-005    | Cameroon | Gorilla | 716923  | 590660  | 82.39 | 587010  | 541142  | 75.48 | 518576  | 72.33 | 724  |
| <b>37</b>    | DA-002    | Cameroon | Gorilla | 739696  | 594459  | 80.37 | 590371  | 527602  | 71.33 | 510247  | 68.98 | 832  |
| <b>41</b>    | DA-008    | Cameroon | Gorilla | 999521  | 874750  | 87.52 | 868974  | 768893  | 76.93 | 710259  | 71.06 | 704  |
| <b>39BIS</b> | DA-006    | Cameroon | Gorilla | 2935809 | 2808803 | 95.67 | 2787968 | 2639966 | 89.92 | 2284488 | 77.81 | 1361 |
| <b>47</b>    | 2017-C-05 | Zoo      | Gorilla | 912566  | 777368  | 85.18 | 766861  | 629828  | 69.02 | 578951  | 63.44 | 1568 |
| <b>49</b>    | 2017-C-02 | Zoo      | Gorilla | 990595  | 871869  | 88.01 | 863567  | 729787  | 73.67 | 682077  | 68.86 | 1459 |
| <b>52</b>    | 2017-C-04 | Zoo      | Gorilla | 801034  | 627113  | 78.29 | 620344  | 524793  | 65.51 | 493683  | 61.63 | 1252 |
| <b>53</b>    | 2017-C-06 | Zoo      | Gorilla | 1098832 | 926930  | 84.36 | 917589  | 782543  | 71.22 | 744054  | 67.71 | 1684 |
| <b>55</b>    | 2017-C-01 | Zoo      | Gorilla | 742989  | 638399  | 85.92 | 632928  | 520665  | 70.08 | 480306  | 64.65 | 1112 |
| <b>56</b>    | 2017-C-03 | Zoo      | Gorilla | 875230  | 745493  | 85.18 | 736387  | 625597  | 71.48 | 591717  | 67.61 | 1479 |

## **Supplementary Methods S1: Semi-directed interview guides**

### For great ape zookeepers

1. How long have you worked at this zoo?
2. How long and in what capacity have you worked with this species of great ape?
3. Can you describe for me a typical day working with these animals?
4. Do your daily activities change seasonally, and if so, how?
5. Can you tell me more about feeding of these animals? (timing, dietary composition and quantities for each animal by age and sex, seasonal changes, other relevant practices)
6. From where do you obtain these foods?
7. How do you organize their time outdoors? Are there ever times when they do not go outdoors?
8. Do they eat plant material in the outdoor enclosure or drink from the canal around the island?
9. Do you provide additional supplements from time to time? What?
10. Can you describe any daily physical interactions that you have with these animals? Do you ever touch them? When and why?
11. Have these great apes been sick recently (within the last two months)? If so, which one(s)? What did you do? Did you provide treatment, and if so, what?
12. In your experience, is it possible for disease to pass between humans and captive animals in this zoo setting? Why or why not? Have you ever witnessed such transmission, and if so, when?

### For inhabitants of southeastern Cameroon

1. What environmental changes have you observed or heard about in this forest ? Over what period of time ? What do you think of these changes ?

2. In your language, how do you refer to a gorilla/chimpanzee?
3. Where do gorillas/chimpanzees reside in this forest? What are their preferred habitats? Do they stay in the same place or do they move around?
4. Do you find gorillas/chimpanzees in close proximity to your village (use map)?
5. Do you hunt gorillas/chimpanzees? Were these animals hunted in the past? When, and by whom?
6. Who hunts gorillas/chimpanzees now?
7. What weapons are used to hunt gorillas/chimpanzees?
8. How are gorillas/chimpanzees usually butchered? Where and by whom?
9. What do you do with the different parts of the animals?
10. Can you describe for me the qualities/personality traits of gorillas/chimpanzees?
11. How do they behave with one another? Have you observed their behavior? What features strike you as most important?
12. Do gorillas/chimpanzees have certain kinds of powers? Which ones ? These powers, have they changed over time?
13. Do gorillas/chimpanzees have knowledge? Of what?
14. What do people think about these animals?
15. How do you behave when you meet one? Why?
16. How do gorillas/chimpanzees behave when they see you?
17. Do people and gorillas/chimpanzees share certain capacities or knowledge ?
18. Do you think that relations between people and gorillas/chimpanzees have changed ? If so, since when ? and why ?
19. Do gorillas/chimpanzees ever fall sick ? How do you know?

20. What do gorillas/chimpanzees do when they are sick ? How do they take care of themselves? (If animal uses leaves for self-treatment, ask person to show leaves. Ask if people use these leaves as well.

21. Is it possible for an illness to be transmitted from a gorilla/chimpanzee to a human? Or from a human to a gorilla/chimpanzee? If so, which illness? How does this happen?

**Supplementary Table S2: Results of pairwise permanova statistics between groups based on a) Bray Curtis distance, b) Unweighted Unifrac distance and c) Weighted Unifrac distance**

**a) Bray Curtis distance**

| <b>Group 1</b>              | <b>Group 2</b>    | <b>Sample size</b> | <b>Permutations</b> | <b>Sums of squares</b> | <b>F. Model</b> | <b>R<sup>2</sup></b> | <b>p-value</b> | <b>Corrected p-value</b> |
|-----------------------------|-------------------|--------------------|---------------------|------------------------|-----------------|----------------------|----------------|--------------------------|
| <b>Cameroon Chimpanzees</b> | Cameroon Gorillas | 21                 | 5000                | 0.16                   | 168.04          | 0.90                 | < 0.001        | 0.002                    |
| <b>Cameroon Chimpanzees</b> | Zoo Chimpanzees   | 12                 | 5000                | 0.04                   | 77.56           | 0.88                 | 0.002          | 0.005                    |
| <b>Cameroon Chimpanzees</b> | Zoo Gorillas      | 12                 | 5000                | 0.04                   | 60.04           | 0.86                 | 0.002          | 0.005                    |
| <b>Cameroon Gorillas</b>    | Zoo Chimpanzees   | 21                 | 5000                | 0.19                   | 208.28          | 0.92                 | < 0.001        | 0.001                    |
| <b>Cameroon Gorillas</b>    | Zoo Gorillas      | 21                 | 5000                | 0.18                   | 181.3           | 0.91                 | < 0.001        | 0.001                    |
| <b>Zoo Chimpanzees</b>      | Zoo Gorillas      | 12                 | 5000                | 0.02                   | 32.2            | 0.76                 | 0.002          | 0.005                    |

**b) Unweighted Unifrac distance**

| <b>Group 1</b>              | <b>Group 2</b>    | <b>Sample size</b> | <b>Permutations</b> | <b>Sums of squares</b> | <b>F. Model</b> | <b>R<sup>2</sup></b> | <b>p-value</b> | <b>Corrected p-value</b> |
|-----------------------------|-------------------|--------------------|---------------------|------------------------|-----------------|----------------------|----------------|--------------------------|
| <b>Cameroon Chimpanzees</b> | Cameroon Gorillas | 21                 | 5000                | 0.12                   | 19.99           | 0.51                 | < 0.001        | 0.002                    |
| <b>Cameroon Chimpanzees</b> | Zoo Chimpanzees   | 12                 | 5000                | 0.06                   | 9.32            | 0.48                 | 0.003          | 0.005                    |
| <b>Cameroon Chimpanzees</b> | Zoo Gorillas      | 12                 | 5000                | 0.06                   | 9.29            | 0.48                 | 0.001          | 0.004                    |
| <b>Cameroon Gorillas</b>    | Zoo Chimpanzees   | 21                 | 5000                | 0.09                   | 21.41           | 0.53                 | < 0.001        | 0.001                    |
| <b>Cameroon Gorillas</b>    | Zoo Gorillas      | 21                 | 5000                | 0.07                   | 15.75           | 0.45                 | < 0.001        | 0.001                    |
| <b>Zoo Chimpanzees</b>      | Zoo Gorillas      | 12                 | 5000                | 0.02                   | 6.51            | 0.39                 | 0.003          | 0.005                    |



c) Weigthed Unifrac distance

| <b>Group 1</b>              | <b>Group 2</b>    | <b>Sample size</b> | <b>Permutations</b> | <b>Sums of squares</b> | <b>F. Model</b> | <b>R<sup>2</sup></b> | <b>p-value</b> | <b>corrected p-value</b> |
|-----------------------------|-------------------|--------------------|---------------------|------------------------|-----------------|----------------------|----------------|--------------------------|
| <b>Cameroon Chimpanzees</b> | Cameroon Gorillas | 21                 | 5000                | 0.06                   | 29.28           | 0.61                 | < 0.001        | 0.001                    |
| <b>Cameroon Chimpanzees</b> | Zoo Chimpanzees   | 12                 | 5000                | 0.04                   | 21.05           | 0.68                 | 0.002          | 0.004                    |
| <b>Cameroon Chimpanzees</b> | Zoo Gorillas      | 12                 | 5000                | 0.05                   | 32.29           | 0.76                 | 0.001          | 0.004                    |
| <b>Cameroon Gorillas</b>    | Zoo Chimpanzees   | 21                 | 5000                | 0.12                   | 65.95           | 0.78                 | < 0.001        | 0.002                    |
| <b>Cameroon Gorillas</b>    | Zoo Gorillas      | 21                 | 5000                | 0.14                   | 84.45           | 0.82                 | < 0.001        | 0.002                    |
| <b>Zoo Chimpanzees</b>      | Zoo Gorillas      | 12                 | 5000                | 0.01                   | 9.95            | 0.50                 | 0.002          | 0.004                    |

**Supplementary Table S3: Percentage of analyzed reads assigned to a known taxa for each taxonomic level**

| <b>Group</b>                | <b>Phylum</b> | <b>Class</b> | <b>Order</b> | <b>Family</b> | <b>Genus</b> |
|-----------------------------|---------------|--------------|--------------|---------------|--------------|
| <b>Cameroon Chimpanzees</b> | 100.0         | 100.0        | 99.8         | 96.0          | 81.7         |
| <b>Cameroon Gorillas</b>    | 100.0         | 100.0        | 99.9         | 94.8          | 71.1         |
| <b>Zoo Chimpanzees</b>      | 100.0         | 99.5         | 99.5         | 95.8          | 72.9         |
| <b>Zoo Gorillas</b>         | 100.0         | 99.7         | 99.7         | 91.6          | 65.5         |
| <b>Cameroon</b>             | 100.0         | 100.0        | 99.9         | 95.1          | 74.1         |
| <b>Zoo</b>                  | 100.0         | 99.6         | 99.6         | 93.7          | 69.2         |
| <b>Chimpanzees</b>          | 100.0         | 99.8         | 99.7         | 95.9          | 77.3         |
| <b>Gorillas</b>             | 100.0         | 99.9         | 99.9         | 93.9          | 69.5         |
| <b>Total</b>                | 100.0         | 99.9         | 99.8         | 94.6          | 72.3         |

**Supplementary Figure S1: Mean taxonomic composition (relative abundance) of samples by group, at phyla level**

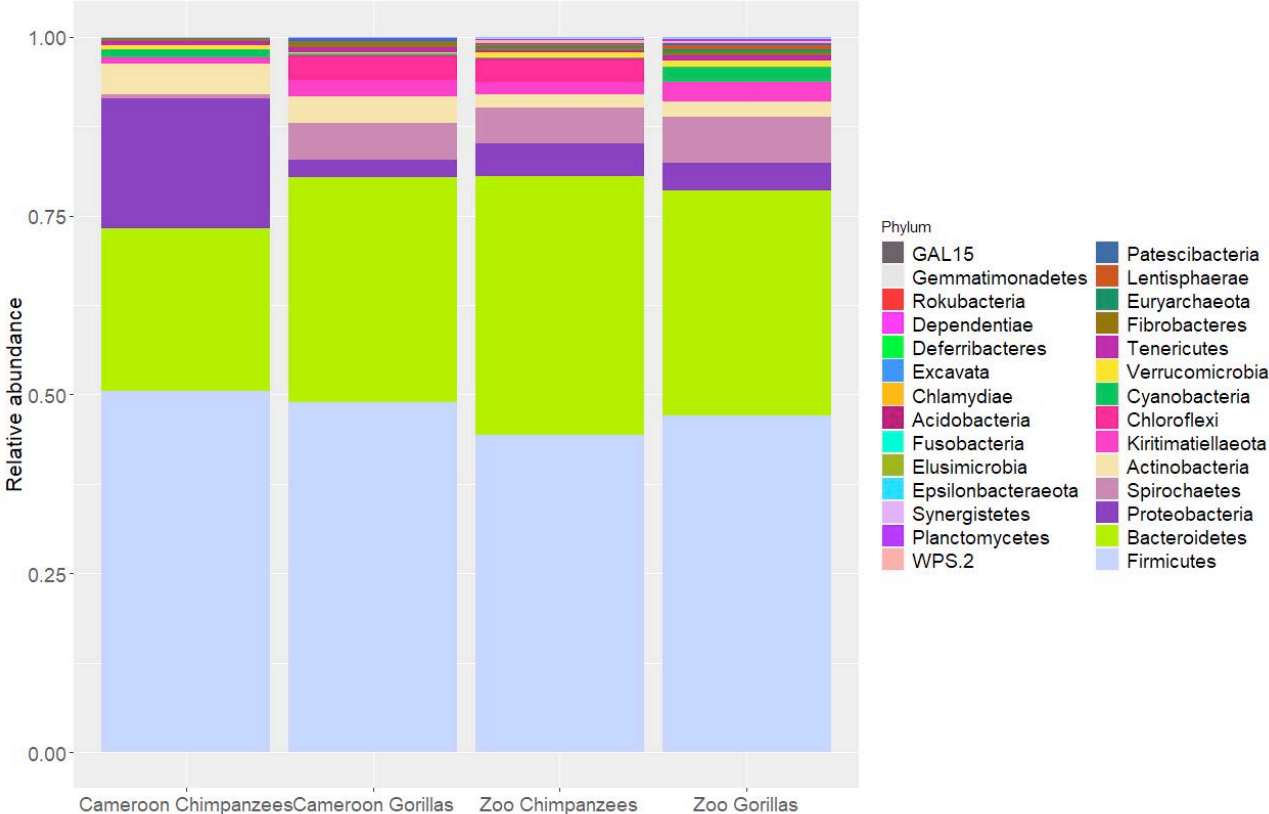

**Supplementary Table S4: Mean and Standard Deviation of phyla with significant differences of relative abundance between zoo and Cameroon forest for chimpanzees and gorillas.** Pairwise wilcoxon tests have been performed with Bonferroni correction.  $N_{\text{Cameroon chimpanzee}}=6$ ;  $N_{\text{Zoochimpanzee}}=6$ ;  $N_{\text{Cameroon gorilla}}=15$ ;  $N_{\text{Cameroon gorilla}}=6$ .

| Species           | Phylum             | Mean Cameroon   | Mean Zoo        | Adjusted p value |
|-------------------|--------------------|-----------------|-----------------|------------------|
| <b>Chimpanzee</b> | Bacteroidetes      | 45636 ± SD=4855 | 72268 ± SD=9121 | 0.013            |
| <b>Chimpanzee</b> | Chloroflexi        | 41 ± SD=69      | 6542 ± SD=4681  | 0.013            |
| <b>Chimpanzee</b> | Cyanobacteria      | 2065 ± SD=818   | 273 ± SD=186    | 0.013            |
| <b>Chimpanzee</b> | Epsilonbacteraeota | 171 ± SD=84     | 36 ± SD=47      | 0.03             |
| <b>Chimpanzee</b> | Euryarchaeota      | 271 ± SD=183    | 769 ± SD=268    | 0.013            |
| <b>Chimpanzee</b> | Spirochaetes       | 1284 ± SD=387   | 10148 ± SD=4518 | 0.013            |
| <b>Gorilla</b>    | Chloroflexi        | 6969 ± SD=4329  | 0 ± SD=1        | 0.003            |
| <b>Gorilla</b>    | Cyanobacteria      | 569 ± SD=520    | 4222 ± SD=808   | < 0.001          |
| <b>Gorilla</b>    | Lentisphaerae      | 133 ± SD=300    | 1106 ± SD=464   | 0.005            |
| <b>Gorilla</b>    | Synergistetes      | 0 ± SD=0        | 402 ± SD=427    | < 0.001          |
| <b>Gorilla</b>    | Verrucomicrobia    | 159 ± SD=437    | 1860 ± SD=1255  | 0.01             |
| <b>Gorilla</b>    | WPS.2              | 2 ± SD=4        | 527 ± SD=403    | < 0.001          |

**Supplementary Table S5: Mean and Standard Deviation of families with significant differences of relative abundance between zoo and Cameroon forest for chimpanzees and gorillas.** Pairwise wilcoxon tests have been performed with Bonferroni correction.  $N_{\text{Cameroon chimpanzee}}=6$ ;  $N_{\text{Zoochimpanzee}}=6$ ;  $N_{\text{Cameroon gorilla}}=15$ ;  $N_{\text{Cameroon gorilla}}=6$ .

| Species           | Phylum             | Famille                         | Mean Cameroon    | Mean Zoo        | Adjusted p value |
|-------------------|--------------------|---------------------------------|------------------|-----------------|------------------|
| <b>Chimpanzee</b> | Actinobacteria     | Coriobacteriales.Incertae.Sedis | 116 ± SD=98      | 578 ± SD=217    | 0.013            |
| <b>Chimpanzee</b> | Actinobacteria     | Bifidobacteriaceae              | 1418 ± SD=739    | 102 ± SD=190    | 0.013            |
| <b>Chimpanzee</b> | Bacteroidetes      | Paludibacteraceae               | 733 ± SD=618     | 5651 ± SD=1234  | 0.03             |
| <b>Chimpanzee</b> | Bacteroidetes      | Tannerellaceae                  | 769 ± SD=320     | 2352 ± SD=353   | 0.013            |
| <b>Chimpanzee</b> | Bacteroidetes      | Weeksellaceae                   | 3186 ± SD=5790   | 0 ± SD=0        | 0.048            |
| <b>Chimpanzee</b> | Chloroflexi        | Anaerolineaceae                 | 41 ± SD=69       | 6541 ± SD=4681  | 0.013            |
| <b>Chimpanzee</b> | Epsilonbacteraeota | Campylobacteraceae              | 156 ± SD=73      | 30 ± SD=40      | 0.049            |
| <b>Chimpanzee</b> | Firmicutes         | Clostridiaceae.1                | 85 ± SD=88       | 3447 ± SD=1964  | 0.013            |
| <b>Chimpanzee</b> | Firmicutes         | Acidaminococcaceae              | 689 ± SD=251     | 5239 ± SD=3795  | 0.026            |
| <b>Chimpanzee</b> | Firmicutes         | Planococcaceae                  | 14219 ± SD=9665  | 0 ± SD=0        | 0.014            |
| <b>Chimpanzee</b> | Lentisphaerae      | Victivallaceae                  | 1 ± SD=2         | 194 ± SD=104    | 0.022            |
| <b>Chimpanzee</b> | Proteobacteria     | Desulfovibrionaceae             | 190 ± SD=111     | 1667 ± SD=781   | 0.013            |
| <b>Chimpanzee</b> | Proteobacteria     | Enterobacteriaceae              | 669 ± SD=1013    | 1 ± SD=1        | 0.026            |
| <b>Chimpanzee</b> | Proteobacteria     | Moraxellaceae                   | 26099 ± SD=20183 | 0 ± SD=0        | 0.014            |
| <b>Chimpanzee</b> | Spirochaetes       | Spirochaetaceae                 | 1284 ± SD=386    | 10145 ± SD=4520 | 0.013            |
| <b>Gorilla</b>    | Actinobacteria     | Coriobacteriales.Incertae.Sedis | 550 ± SD=316     | 141 ± SD=61     | 0.006            |
| <b>Gorilla</b>    | Actinobacteria     | Eggerthellaceae                 | 3433 ± SD=2812   | 765 ± SD=340    | 0.007            |
| <b>Gorilla</b>    | Bacteroidetes      | Bacteroidales.UCG.001           | 0 ± SD=0         | 1368 ± SD=1502  | < 0.001          |
| <b>Gorilla</b>    | Bacteroidetes      | F082                            | 0 ± SD=0         | 10423 ± SD=5114 | < 0.001          |
| <b>Gorilla</b>    | Bacteroidetes      | Rikenellaceae                   | 12022 ± SD=6775  | 4632 ± SD=1752  | 0.007            |
| <b>Gorilla</b>    | Bacteroidetes      | Tannerellaceae                  | 441 ± SD=306     | 1847 ± SD=875   | < 0.001          |
| <b>Gorilla</b>    | Chloroflexi        | Anaerolineaceae                 | 6965 ± SD=4330   | 0 ± SD=1        | 0.003            |
| <b>Gorilla</b>    | Firmicutes         | Clostridiales.vadinBB60.group   | 3573 ± SD=2727   | 8713 ± SD=1705  | 0.007            |

|                |                 |                    |                 |                 |         |
|----------------|-----------------|--------------------|-----------------|-----------------|---------|
| <b>Gorilla</b> | Firmicutes      | Family.XIII        | 5365 ± SD=1887  | 1069 ± SD=336   | < 0.001 |
| <b>Gorilla</b> | Firmicutes      | Lachnospiraceae    | 27560 ± SD=6688 | 16590 ± SD=3001 | 0.004   |
| <b>Gorilla</b> | Lentisphaerae   | Victivallaceae     | 0 ± SD=0        | 488 ± SD=573    | < 0.001 |
| <b>Gorilla</b> | Synergistetes   | Synergistaceae     | 0 ± SD=0        | 402 ± SD=427    | < 0.001 |
| <b>Gorilla</b> | Tenericutes     | Acholeplasmataceae | 384 ± SD=400    | 0 ± SD=0        | 0.039   |
| <b>Gorilla</b> | Verrucomicrobia | Puniceicoccaceae   | 150 ± SD=429    | 1860 ± SD=1255  | 0.01    |

**Supplementary Table S6: Mean and Standard Deviation of genera with significant differences of relative abundance between zoo and Cameroon forest for chimpanzees and gorillas.** Pairwise wilcoxon tests have been performed with Bonferroni correction.  $N_{\text{Cameroon chimpanzee}}=6$ ;  $N_{\text{Zoochimpanzee}}=6$ ;  $N_{\text{Cameroon gorilla}}=15$ ;  $N_{\text{Cameroon gorilla}}=6$ .

| Species    | Phylum             | Famille                         | Genre                           | Mean Cameroon   | Mean Zoo        | Adjusted p value |
|------------|--------------------|---------------------------------|---------------------------------|-----------------|-----------------|------------------|
| Chimpanzee | Actinobacteria     | Coriobacteriales Incertae Sedis | Phoenicibacter                  | 79 ± SD=62      | 576 ± SD=216    | 0.013            |
| Chimpanzee | Actinobacteria     | Bifidobacteriaceae              | Bifidobacterium                 | 1418 ± SD=739   | 102 ± SD=190    | 0.013            |
| Chimpanzee | Actinobacteria     | Atopobiaceae                    | Olsenella                       | 777 ± SD=510    | 0 ± SD=0        | 0.017            |
| Chimpanzee | Bacteroidetes      | Prevotellaceae                  | Prevotella 2                    | 0 ± SD=0        | 1431 ± SD=1030  | 0.017            |
| Chimpanzee | Bacteroidetes      | Rikenellaceae                   | dgA 11 gut group                | 17 ± SD=29      | 707 ± SD=350    | 0.03             |
| Chimpanzee | Bacteroidetes      | Prevotellaceae                  | Prevotella 1                    | 62 ± SD=105     | 773 ± SD=347    | 0.049            |
| Chimpanzee | Bacteroidetes      | Prevotellaceae                  | Prevotellaceae UCG 001          | 1815 ± SD=802   | 10295 ± SD=5570 | 0.013            |
| Chimpanzee | Bacteroidetes      | Tannerellaceae                  | Parabacteroides                 | 526 ± SD=311    | 2352 ± SD=353   | 0.013            |
| Chimpanzee | Bacteroidetes      | Prevotellaceae                  | Prevotella 9                    | 8255 ± SD=3449  | 16131 ± SD=4640 | 0.026            |
| Chimpanzee | Bacteroidetes      | Prevotellaceae                  | Prevotella 7                    | 10565 ± SD=4126 | 0 ± SD=1        | 0.022            |
| Chimpanzee | Bacteroidetes      | Prevotellaceae                  | Prevotellaceae NK3B31 group     | 1173 ± SD=1743  | 0 ± SD=0        | 0.017            |
| Chimpanzee | Bacteroidetes      | Muribaculaceae                  | metagenome                      | 708 ± SD=818    | 0 ± SD=0        | 0.017            |
| Chimpanzee | Bacteroidetes      | Flavobacteriaceae               | Flavobacterium                  | 1129 ± SD=2658  | 0 ± SD=0        | 0.048            |
| Chimpanzee | Bacteroidetes      | Weeksellaceae                   | Empedobacter                    | 595 ± SD=1436   | 0 ± SD=0        | 0.029            |
| Chimpanzee | Chloroflexi        | Anaerolineaceae                 | Flexilinea                      | 41 ± SD=69      | 6541 ± SD=4681  | 0.013            |
| Chimpanzee | Epsilonbacteraeota | Campylobacteraceae              | Campylobacter                   | 156 ± SD=73     | 30 ± SD=40      | 0.049            |
| Chimpanzee | Euryarchaeota      | Methanomethylophilaceae         | Candidatus Methanomethylophilus | 0 ± SD=0        | 59 ± SD=58      | 0.017            |
| Chimpanzee | Firmicutes         | Clostridiaceae 1                | Clostridium sensu stricto 1     | 0 ± SD=0        | 1724 ± SD=2133  | 0.017            |
| Chimpanzee | Firmicutes         | Ruminococcaceae                 | Ruminiclostridium 6             | 10 ± SD=23      | 586 ± SD=707    | 0.037            |
| Chimpanzee | Firmicutes         | Clostridiaceae 1                | Sarcina                         | 85 ± SD=88      | 1721 ± SD=1103  | 0.013            |

|                   |                |                               |                               |                  |                |         |
|-------------------|----------------|-------------------------------|-------------------------------|------------------|----------------|---------|
| <b>Chimpanzee</b> | Firmicutes     | Lachnospiraceae               | Acetitomaculum                | 70 ± SD=22       | 1271 ± SD=848  | 0.013   |
| <b>Chimpanzee</b> | Firmicutes     | Lachnospiraceae               | Ruminococcus gauvreauii group | 43 ± SD=34       | 522 ± SD=508   | 0.03    |
| <b>Chimpanzee</b> | Firmicutes     | Ruminococcaceae               | Ruminococcus 1                | 202 ± SD=92      | 2163 ± SD=1846 | 0.013   |
| <b>Chimpanzee</b> | Firmicutes     | Acidaminococcaceae            | Phascolarctobacterium         | 689 ± SD=251     | 5239 ± SD=3795 | 0.026   |
| <b>Chimpanzee</b> | Firmicutes     | Clostridiales vadinBB60 group | gut metagenome                | 194 ± SD=121     | 669 ± SD=258   | 0.013   |
| <b>Chimpanzee</b> | Firmicutes     | Lachnospiraceae               | Roseburia                     | 1310 ± SD=580    | 368 ± SD=223   | 0.013   |
| <b>Chimpanzee</b> | Firmicutes     | Ruminococcaceae               | Butyricicoccus                | 233 ± SD=168     | 45 ± SD=21     | 0.013   |
| <b>Chimpanzee</b> | Firmicutes     | Lachnospiraceae               | Lachnoclostridium             | 1532 ± SD=392    | 271 ± SD=160   | 0.013   |
| <b>Chimpanzee</b> | Firmicutes     | Lachnospiraceae               | Oribacterium                  | 7104 ± SD=1197   | 887 ± SD=532   | 0.013   |
| <b>Chimpanzee</b> | Firmicutes     | Ruminococcaceae               | Ruminococcaceae UCG 008       | 6492 ± SD=4439   | 804 ± SD=605   | 0.026   |
| <b>Chimpanzee</b> | Firmicutes     | Family XIII                   | Family XIII UCG 001           | 440 ± SD=223     | 46 ± SD=13     | 0.03    |
| <b>Chimpanzee</b> | Firmicutes     | Lachnospiraceae               | Lachnospiraceae UCG 004       | 1792 ± SD=610    | 179 ± SD=105   | 0.013   |
| <b>Chimpanzee</b> | Firmicutes     | Lachnospiraceae               | Anaerostipes                  | 446 ± SD=202     | 36 ± SD=32     | 0.013   |
| <b>Chimpanzee</b> | Firmicutes     | Ruminococcaceae               | Ruminiclostridium 5           | 1307 ± SD=587    | 86 ± SD=88     | 0.013   |
| <b>Chimpanzee</b> | Firmicutes     | Lachnospiraceae               | GCA 900066575                 | 514 ± SD=259     | 28 ± SD=25     | 0.03    |
| <b>Chimpanzee</b> | Firmicutes     | Planococcaceae                | Rummeliibacillus              | 960 ± SD=1068    | 0 ± SD=0       | 0.008   |
| <b>Chimpanzee</b> | Firmicutes     | Planococcaceae                | Kurthia                       | 8568 ± SD=8385   | 0 ± SD=0       | 0.008   |
| <b>Chimpanzee</b> | Proteobacteria | Desulfovibrionaceae           | Desulfovibrio                 | 190 ± SD=111     | 1556 ± SD=745  | 0.013   |
| <b>Chimpanzee</b> | Proteobacteria | Burkholderiaceae              | Comamonas                     | 1737 ± SD=4172   | 0 ± SD=0       | 0.048   |
| <b>Chimpanzee</b> | Proteobacteria | Moraxellaceae                 | Acinetobacter                 | 26099 ± SD=20183 | 0 ± SD=0       | 0.014   |
| <b>Chimpanzee</b> | Spirochaetes   | Spirochaetaceae               | Sphaerochaeta                 | 284 ± SD=221     | 2452 ± SD=1158 | 0.013   |
| <b>Chimpanzee</b> | Spirochaetes   | Spirochaetaceae               | Treponema 2                   | 1000 ± SD=207    | 7670 ± SD=5015 | 0.013   |
| <b>Gorilla</b>    | Actinobacteria | Atopobiaceae                  | Libanicoccus                  | 718 ± SD=789     | 0 ± SD=0       | 0.003   |
| <b>Gorilla</b>    | Actinobacteria | Eggerthellaceae               | Senegalimassilia              | 777 ± SD=752     | 66 ± SD=94     | 0.012   |
| <b>Gorilla</b>    | Bacteroidetes  | Prevotellaceae                | Prevotella 1                  | 89 ± SD=129      | 3277 ± SD=2944 | 0.003   |
| <b>Gorilla</b>    | Bacteroidetes  | Prevotellaceae                | Prevotellaceae UCG 001        | 2063 ± SD=1823   | 5416 ± SD=2194 | 0.028   |
| <b>Gorilla</b>    | Bacteroidetes  | Prevotellaceae                | Prevotellaceae UCG 003        | 482 ± SD=326     | 2051 ± SD=940  | 0.004   |
| <b>Gorilla</b>    | Bacteroidetes  | Prevotellaceae                | Prevotellaceae UCG 004        | 2393 ± SD=2692   | 186 ± SD=171   | < 0.001 |



|                |               |                         |                                     |                 |                |         |
|----------------|---------------|-------------------------|-------------------------------------|-----------------|----------------|---------|
| <b>Gorilla</b> | Bacteroidetes | Rikenellaceae           | dgA 11 gut group                    | 0 ± SD=0        | 491 ± SD=382   | < 0.001 |
| <b>Gorilla</b> | Bacteroidetes | Rikenellaceae           | Rikenellaceae RC9 gut group         | 12000 ± SD=6776 | 3904 ± SD=1836 | 0.007   |
| <b>Gorilla</b> | Bacteroidetes | Tannerellaceae          | Parabacteroides                     | 439 ± SD=304    | 1847 ± SD=875  | < 0.001 |
| <b>Gorilla</b> | Chloroflexi   | Anaerolineaceae         | Flexilinea                          | 6965 ± SD=4330  | 0 ± SD=1       | 0.003   |
| <b>Gorilla</b> | Euryarchaeota | Methanomethylophilaceae | Candidatus Methanomethylophilus     | 361 ± SD=321    | 13 ± SD=18     | 0.003   |
| <b>Gorilla</b> | Firmicutes    | Clostridiaceae 1        | Clostridium sensu stricto 1         | 28 ± SD=99      | 322 ± SD=436   | 0.026   |
| <b>Gorilla</b> | Firmicutes    | Family XIII             | Family XIII AD3011 group            | 4185 ± SD=1520  | 313 ± SD=46    | < 0.001 |
| <b>Gorilla</b> | Firmicutes    | Lachnospiraceae         | Eubacterium eligens group           | 2 ± SD=6        | 107 ± SD=68    | < 0.001 |
| <b>Gorilla</b> | Firmicutes    | Lachnospiraceae         | Eubacterium hallii group            | 1284 ± SD=808   | 73 ± SD=75     | 0.003   |
| <b>Gorilla</b> | Firmicutes    | Lachnospiraceae         | Eubacterium ruminantium group       | 46 ± SD=63      | 482 ± SD=447   | 0.04    |
| <b>Gorilla</b> | Firmicutes    | Lachnospiraceae         | Acetitomaculum                      | 392 ± SD=339    | 50 ± SD=36     | 0.006   |
| <b>Gorilla</b> | Firmicutes    | Lachnospiraceae         | Agathobacter                        | 652 ± SD=578    | 46 ± SD=61     | 0.01    |
| <b>Gorilla</b> | Firmicutes    | Lachnospiraceae         | GCA 900066575                       | 0 ± SD=0        | 81 ± SD=75     | < 0.001 |
| <b>Gorilla</b> | Firmicutes    | Lachnospiraceae         | Lachnospiraceae ND3007 group        | 4202 ± SD=3244  | 94 ± SD=88     | < 0.001 |
| <b>Gorilla</b> | Firmicutes    | Lachnospiraceae         | Lachnospiraceae NK3A20 group        | 704 ± SD=442    | 101 ± SD=226   | 0.016   |
| <b>Gorilla</b> | Firmicutes    | Lachnospiraceae         | Lachnospiraceae NK4A136 group       | 18 ± SD=48      | 724 ± SD=561   | 0.001   |
| <b>Gorilla</b> | Firmicutes    | Lachnospiraceae         | Lachnospiraceae XPB1014 group       | 0 ± SD=0        | 3992 ± SD=2363 | < 0.001 |
| <b>Gorilla</b> | Firmicutes    | Lachnospiraceae         | Pseudobutyrvibrio                   | 4267 ± SD=2037  | 37 ± SD=26     | < 0.001 |
| <b>Gorilla</b> | Firmicutes    | Ruminococcaceae         | Eubacterium coprostanoligenes group | 12311 ± SD=4829 | 4785 ± SD=2319 | 0.004   |
| <b>Gorilla</b> | Firmicutes    | Ruminococcaceae         | Candidatus Soleaferrea              | 91 ± SD=78      | 701 ± SD=293   | 0.006   |
| <b>Gorilla</b> | Firmicutes    | Ruminococcaceae         | Hydrogenoanaerobacterium            | 640 ± SD=287    | 64 ± SD=41     | < 0.001 |
| <b>Gorilla</b> | Firmicutes    | Ruminococcaceae         | Oscillibacter                       | 124 ± SD=99     | 370 ± SD=107   | 0.016   |
| <b>Gorilla</b> | Firmicutes    | Ruminococcaceae         | Ruminiclostridium 5                 | 1954 ± SD=1797  | 70 ± SD=48     | < 0.001 |
| <b>Gorilla</b> | Firmicutes    | Ruminococcaceae         | Ruminiclostridium 6                 | 12 ± SD=30      | 962 ± SD=621   | 0.001   |
| <b>Gorilla</b> | Firmicutes    | Ruminococcaceae         | Ruminococcaceae UCG 002             | 1175 ± SD=517   | 4267 ± SD=1613 | < 0.001 |
| <b>Gorilla</b> | Firmicutes    | Ruminococcaceae         | Ruminococcaceae UCG 003             | 29 ± SD=62      | 432 ± SD=351   | 0.006   |
| <b>Gorilla</b> | Firmicutes    | Ruminococcaceae         | Ruminococcaceae UCG 005             | 2970 ± SD=1196  | 5665 ± SD=1671 | 0.02    |
| <b>Gorilla</b> | Firmicutes    | Ruminococcaceae         | Ruminococcaceae UCG 013             | 177 ± SD=191    | 1017 ± SD=379  | < 0.001 |

|                |                 |                     |                             |               |                |         |
|----------------|-----------------|---------------------|-----------------------------|---------------|----------------|---------|
| <b>Gorilla</b> | Firmicutes      | Erysipelotrichaceae | Erysipelotrichaceae UCG 006 | 0 ± SD=0      | 38 ± SD=41     | < 0.001 |
| <b>Gorilla</b> | Firmicutes      | Erysipelotrichaceae | Holdemanella                | 307 ± SD=316  | 10 ± SD=15     | 0.003   |
| <b>Gorilla</b> | Firmicutes      | Erysipelotrichaceae | Ileibacterium               | 0 ± SD=0      | 773 ± SD=1777  | 0.002   |
| <b>Gorilla</b> | Firmicutes      | Erysipelotrichaceae | Solobacterium               | 1241 ± SD=869 | 209 ± SD=350   | 0.01    |
| <b>Gorilla</b> | Proteobacteria  | uncultured          | gut metagenome              | 3 ± SD=12     | 216 ± SD=165   | < 0.001 |
| <b>Gorilla</b> | Proteobacteria  | Succinivibrionaceae | Ruminobacter                | 1 ± SD=3      | 601 ± SD=248   | < 0.001 |
| <b>Gorilla</b> | Proteobacteria  | Burkholderiaceae    | Parasutterella              | 0 ± SD=0      | 2458 ± SD=3104 | < 0.001 |
| <b>Gorilla</b> | Spirochaetes    | Spirochaetaceae     | Sphaerochaeta               | 796 ± SD=505  | 5838 ± SD=3142 | < 0.001 |
| <b>Gorilla</b> | Tenericutes     | Acholeplasmataceae  | Acholeplasma                | 384 ± SD=400  | 0 ± SD=0       | 0.039   |
| <b>Gorilla</b> | Verrucomicrobia | Puniceicoccaceae    | Cerasicoccus                | 112 ± SD=430  | 1441 ± SD=1235 | 0.003   |
